# Supplementary material
Source: PubMed Central journal article supplement (PMC2844127)
Supplement: NIHMS178529-supplement-1_si_001.pdf [file NIHMS178529-supplement-1_si_001.pdf]

**Discovery of 4-(4-(2-((5-hydroxy-1,2,3,4-tetrahydronaphthalen-2-yl)(propyl)amino)-ethyl)piperazin-1-yl)quinolin-8-ol and its analogues with highly efficacious dopamine D2/D3 agonists activity along with a capacity to bind to iron: potential application in symptomatic and neuroprotective therapy for Parkinson's Disease.**

Balaram Ghosh,<sup>1</sup> Tamara Antonio,<sup>2</sup> Maarten E. A. Reith,<sup>2,3</sup> Alope K. Dutta.<sup>1</sup>

1. Wayne State University, Department of Pharmaceutical Sciences, Detroit, MI

48202

2. New York University, Department of Psychiatry, New York, N.Y. 10016

3. New York University, Department of Pharmacology, New York, N.Y. 10016

**Elemental Analysis**

| Compound                        | Elemental Analysis |      |      |       |      |      |
|---------------------------------|--------------------|------|------|-------|------|------|
|                                 | Calculated         |      |      | Found |      |      |
|                                 | C                  | H    | N    | C     | H    | N    |
| <b>12a</b> (D-327)              | 54.09              | 6.98 | 8.70 | 54.48 | 7.39 | 8.42 |
| <b>12b</b> (D-376)              | 52.34              | 7.12 | 8.42 | 52.70 | 7.44 | 8.37 |
| <b>19a</b> (D-339)              | 53.24              | 6.83 | 8.87 | 53.20 | 6.85 | 8.85 |
| <b>19b</b> (D-340)              | 53.54              | 6.80 | 8.92 | 53.38 | 7.14 | 8.95 |
| <i>S</i> (-) <b>19b</b> (D-369) | 54.64              | 6.71 | 9.10 | 54.65 | 6.91 | 8.91 |
| <i>R</i> (+) <b>19b</b> (D-368) | 51.62              | 6.96 | 8.60 | 51.31 | 7.05 | 8.29 |
| <i>R</i> (+) <b>19a</b> (D-375) | 54.32              | 6.74 | 9.05 | 54.72 | 6.85 | 8.72 |
